# Supplementary material
Source: MDPI journal article supplement (https://www.mdpi.com/2072-4292/14/5/1285)
Supplement: s1 [file s1]

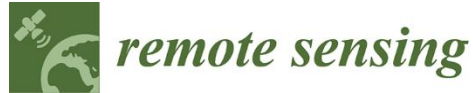

Supplementary Materials for

**Satellite-based Diagnosis and Numerical Verification of Ozone  
Formation Regimes over Nine Megacities in East Asia**

Hyo-Jung Lee, Lim-Seok Chang, Daniel A. Jaffe, Juseon Bak, Xiong Liu, Gonzalo González Abad, Hyun-Young Jo, Yu-Jin Jo, Jae-Bum Lee, Geum-Hee Yang, Jong-Min Kim and Cheol-Hee Kim\*

Correspondence: Cheol-Hee Kim (chkim2@pusan.ac.kr)

**This file includes:**

Table S1 to S4

Figure S1

**Table S1.** WRF-Chem configuration

| <b>Physics option</b>     | <b>Adopted scheme</b>                                                     |
|---------------------------|---------------------------------------------------------------------------|
| Microphysics              | Lin et al. scheme                                                         |
| Longwave radiation        | Rapid radiative transfer model (RRTM)                                     |
| Shortwave radiation       | Goddard                                                                   |
| Surface layer             | Monin-Obukhov similarity                                                  |
| Land surface              | Noah Land Surface Model                                                   |
| Planetary boundary layer  | Yonsei University scheme                                                  |
| Cumulus parameterizations | Grell 3D                                                                  |
| <b>Chemistry option</b>   | <b>Adopted scheme</b>                                                     |
| Photolysis                | Madronich photolysis (TUV)                                                |
| Gas phase chemistry       | NOAA/ESRL Regional Atmospheric Chemistry (RACM)                           |
| Aerosols                  | Modal Approach Dynamics model for Europe/ Volatility Basis Set (MADE/VBS) |
| Anthropogenic emissions   | KORUSv.5                                                                  |
| Biogenic emissions        | Model of Emissions of Gases and Aerosols from Nature (MEGAN) v.2.04       |
| Biomass burning emissions | Fire Inventory of NCAR (FINN) v.1.5                                       |

**Table S2.** Summary statistics for comparison between WRF-Chem simulations and observed O<sub>3</sub> and NO<sub>2</sub> concentrations by surface and aircraft measurement for the KORUS-AQ campaign period (May 2016)

|                                                 | Pearson correlation coefficient ( <b>R</b> ) | Index of agreement ( <b>IOA</b> ) | Normalized mean bias ( <b>NMB</b> ) | Root mean square error ( <b>RMSE</b> ) |
|-------------------------------------------------|----------------------------------------------|-----------------------------------|-------------------------------------|----------------------------------------|
| <i>WRF-Chem vs. Surface measurement (Seoul)</i> |                                              |                                   |                                     |                                        |
| <b>O<sub>3</sub></b>                            | 0.50                                         | 0.53                              | -0.29                               | 28.40                                  |
| <b>NO<sub>2</sub></b>                           | 0.84                                         | 0.91                              | 0.30                                | 2.09                                   |
| <i>WRF-Chem vs. DC-8 measurement</i>            |                                              |                                   |                                     |                                        |
| <b>O<sub>3</sub></b>                            | 0.67                                         | 0.74                              | -0.36                               | 21.24                                  |
| <b>NO<sub>2</sub></b>                           | 0.52                                         | 0.68                              | 0.13                                | 16.03                                  |

$$R = \frac{\sum(O - \bar{O})(S - \bar{S})}{\sqrt{\sum(O - \bar{O})^2} \sqrt{\sum(S - \bar{S})^2}}$$

$$IOA = 1 - \frac{\sum((S - \bar{S}) - (O - \bar{O}))^2}{\sum(|S - \bar{S}| + |O - \bar{O}|)^2}$$

$$NMB = \frac{\sum(O - S)}{\sum O}$$

$$RMSE = \sqrt{\frac{1}{N} \sum (S - O)^2}$$

*N*: sample size, *O*: observation, *S*: Simulation

**Table S3.** Simulated O<sub>3</sub> concentrations at 9 megacities averaged over the KORUS-AQ campaign period (May 2016) for base case plus 3 emission reduction scenarios (unit: ppbv)

| <b>City</b> | <b>Control</b> | <b>NO<sub>x</sub> 50%<br/>reduction</b> | <b>VOCs 50%<br/>reduction</b> | <b>Both 50%<br/>reduction</b> |
|-------------|----------------|-----------------------------------------|-------------------------------|-------------------------------|
| Beijing     | 37.04          | 41.07                                   | 30.67                         | 36.72                         |
| Shanghai    | 31.98          | 41.45                                   | 25.46                         | 34.60                         |
| Tianjin     | 35.90          | 39.03                                   | 30.28                         | 35.41                         |
| Hebei       | 40.49          | 41.88                                   | 35.13                         | 38.64                         |
| Shandong    | 51.68          | 49.81                                   | 45.12                         | 45.73                         |
| Seoul       | 29.54          | 38.06                                   | 26.60                         | 33.70                         |
| Busan       | 40.66          | 44.59                                   | 36.20                         | 40.69                         |
| Osaka       | 39.37          | 40.56                                   | 37.59                         | 38.87                         |
| Tokyo       | 34.62          | 38.79                                   | 34.02                         | 37.01                         |

**Table S4.** Simulated O<sub>3</sub> concentrations at 9 megacities averaged over the KORUS-AQ campaign period (May 2016) for base case plus 3 Chinese emission reduction scenarios (unit: ppbv)

| City     | Control | NO <sub>x</sub> 50% reduction | VOCs 50% reduction | Both 50% reduction |
|----------|---------|-------------------------------|--------------------|--------------------|
| Beijing  | 37.04   | 41.06                         | 30.97              | 37.23              |
| Shanghai | 31.98   | 40.51                         | 24.77              | 34.71              |
| Tianjin  | 35.90   | 39.38                         | 30.76              | 36.18              |
| Hebei    | 40.49   | 42.19                         | 35.50              | 39.24              |
| Shandong | 51.68   | 50.64                         | 46.28              | 47.34              |
| Seoul    | 29.54   | 27.30                         | 27.43              | 25.91              |
| Busan    | 40.66   | 38.28                         | 38.47              | 36.75              |
| Osaka    | 39.37   | 37.88                         | 38.47              | 37.22              |
| Tokyo    | 34.62   | 32.97                         | 33.77              | 32.31              |

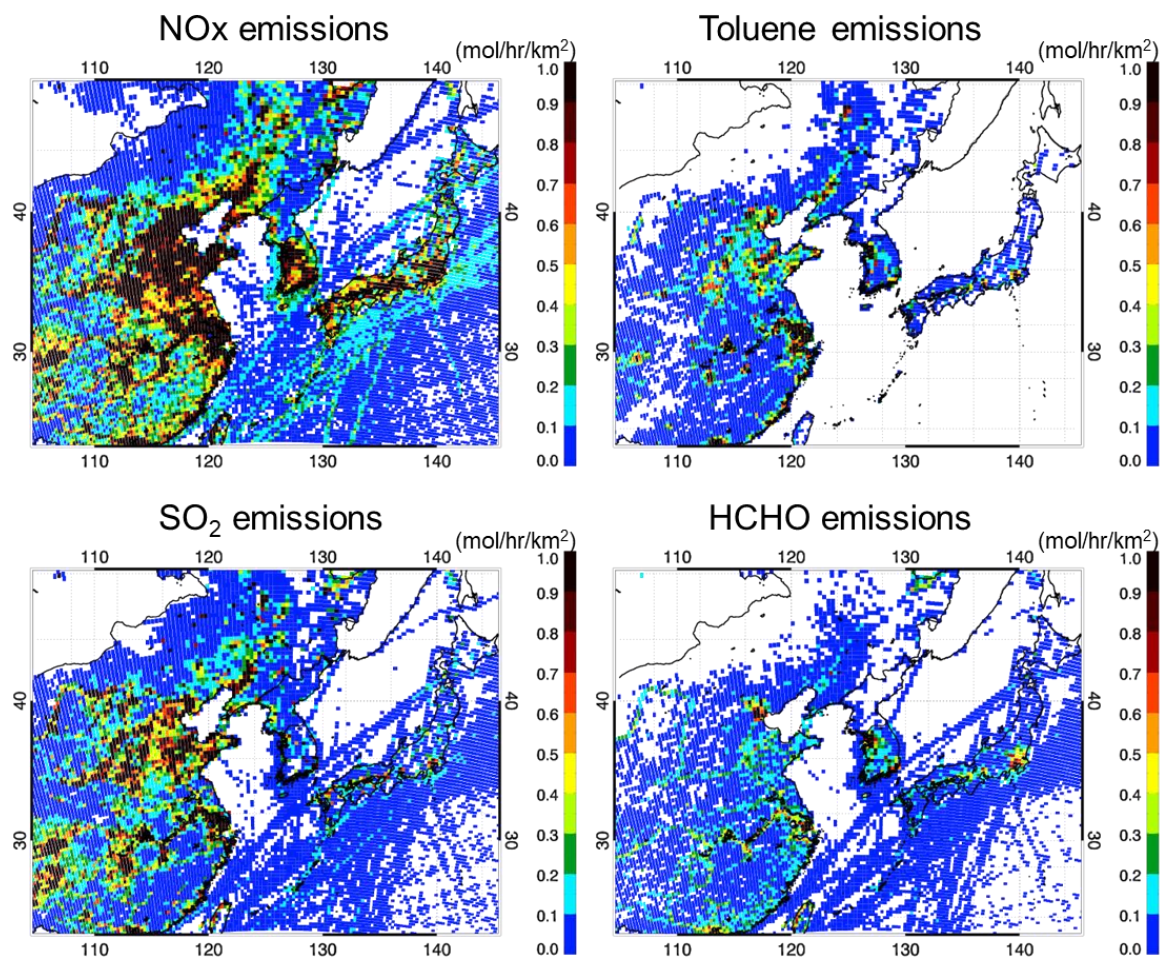

**Figure S1.** Horizontal distributions of emissions for NO<sub>x</sub>, SO<sub>2</sub>, Toluene, and HCHO (KORUS-AQ v.5) used in this study
